# Supplementary material for: Resilience, Emotional Intelligence, and Occupational Performance in Family Members Who Are the Caretakers of Patients with Dementia in Spain: A Cross-Sectional, Analytical, and Descriptive Study
Source: MDPI journal article supplement (doi:10.3390/jcm10184262), 2021-09-20
Supplement: s1 [file s1]

# SUPPLEMENTAL MATERIAL

**Table S1.** Demographic. psychosocial and clinical outcomes.

| SOCIODEMOGRAPHIC DATA                               |                                       |                   |             |
|-----------------------------------------------------|---------------------------------------|-------------------|-------------|
|                                                     |                                       | % or/and M±SD (n) |             |
| SEX                                                 | Women                                 | 70.1 % (101)      |             |
|                                                     | Men                                   | 29.9 % (43)       |             |
| LEVEL OF STUDIES                                    | Without studies                       | 13.9 %(20)        |             |
|                                                     | Basic Studies                         | 49.3 %(71)        |             |
|                                                     | Baccalaureate                         | 22.2 %(32)        |             |
|                                                     | Superior                              | 14.60 %(21)       |             |
| CIVIL_STATUS                                        | Married                               | 79.2 %(105)       |             |
|                                                     | Living with partner                   | 6.9 %(10)         |             |
|                                                     | Single                                | 1.4 %(2)          |             |
|                                                     | Separated                             | 12.5 %(18)        |             |
| AGE                                                 | 20-30                                 | 1.4 %(2)          |             |
|                                                     | 31-40                                 | 3.5 %(5)          |             |
|                                                     | 41-50                                 | 28.8 %(41)        |             |
|                                                     | 51-60                                 | 23.6 %(34)        |             |
|                                                     | 61 or more                            | 50.7 %(73)        |             |
| Nº OF CHILDREN                                      | None                                  | 20.8 %(30)        |             |
|                                                     | 1 child                               | 5.6 %(8)          |             |
|                                                     | 2 children                            | 41 %(59)          |             |
|                                                     | 3 children                            | 22.2 %(32)        |             |
|                                                     | 4 or more children                    | 10.4%(15)         |             |
|                                                     |                                       | YES%              | NO%         |
| PEOPLE WHO LIVE AT HOME                             | Couple                                | 79.9%(115)        | 20.1%(29)   |
|                                                     | Children                              | 37.5%(54)         | 62.5%(90)   |
|                                                     | Mother                                | 38.2%(55)         | 61.8%(89)   |
|                                                     | Father                                | 11.1%(16)         | 88.9%(128)  |
|                                                     | Siblings                              | 2.8%(4)           | 97.2%(140)  |
|                                                     | Mother and Father-in-law              | 1.4 %(2)          | 98.6%(142)  |
|                                                     | Caretakers                            | 1.4 %(2)          | 98.6%(142)  |
|                                                     | Grandchildren. grandparents. neighbor | 2.8%(4)           | 97.2%(140)  |
| 2.93± 1.11                                          |                                       |                   |             |
|                                                     |                                       | YES%              | NO%         |
| EMPLOYMENT SITUATION                                | Work outside of the home/paid work    | 28.5%(41)         | 71.5 %(103) |
| RELATIONSHIP OF FAMILY MEMBER WITH DEMENTIA PATIENT | Mother                                | 44%(64)           |             |
|                                                     | Spouse                                | 38.9%(56)         |             |
|                                                     | Father                                | 11.1%(16)         |             |
|                                                     | Father or Mother-in-law               | 2.1%(3)           |             |
|                                                     | Brother or Sister                     | 2.1%(3)           |             |
|                                                     | Grandma or Grandpa                    | 0.7 %(1)          |             |

|          |         |
|----------|---------|
| Neighbor | 0.7%(1) |
|----------|---------|

Abbreviations: M. mean; SD. standard deviation.

**Table S2.** Psychosocial and clinical outcomes

| PSYCHOSOCIAL DATA             |                                                                      |             |            |
|-------------------------------|----------------------------------------------------------------------|-------------|------------|
| AGE OF THE PATIENT            | 50-60 years                                                          | 2.1 %(3)    |            |
|                               | 61-70 years                                                          | 10.4%(15)   |            |
|                               | 71-80 years                                                          | 41 %(59)    |            |
|                               | 81-90 years                                                          | 42.4 %(61)  |            |
|                               | 90 or more years                                                     | 4.2%(6)     |            |
|                               |                                                                      | YES%        | NO%        |
| Type of Care                  | Taking care of other people. besides the family member with dementia | 37.5%(54)   | 62.5%(90)  |
|                               | Hours of the day dedicated to the care of the sick family member     | 15.65± 7.71 |            |
|                               | Days of the week                                                     | 6.86± 0.67  |            |
|                               | Time spent under care                                                |             |            |
|                               | < 6 months                                                           | 1.4%(2)     |            |
|                               | 6-12 months                                                          | 9.2%(13)    |            |
|                               | 1-2 years                                                            | 14.8%(21)   |            |
|                               | 2-4 years                                                            | 29.6%(43)   |            |
|                               | 4-6 years                                                            | 14.1%(20)   |            |
|                               | >6 years                                                             | 31.0%(45)   |            |
|                               |                                                                      | YES%        | NO%        |
| SUPPORT                       | <b>Formal support for the care of their family member</b>            | 85.4 %(123) | 14.6 %(21) |
|                               | <b>Type of formal support</b>                                        |             |            |
|                               | Day Center                                                           | 78 %(112)   |            |
|                               | Help at home                                                         | 32.5%(47)   |            |
|                               | Major residencies                                                    | 3.3%(5)     |            |
|                               | Economic presentation                                                | 8.9%(13)    |            |
|                               | Others                                                               | 4.9%(7)     |            |
|                               | <b>Type of informal support</b>                                      |             |            |
|                               | Family                                                               | 93.7%(135)  |            |
|                               | Friends                                                              | 5.4%(9)     |            |
|                               |                                                                      | YES%        | NO%        |
| LIVING THROUGH THE EXPERIENCE | <b>Positive support</b>                                              | 72.2 %(104) | 27.8 %(40) |
|                               | <b>Positive contributed feelings</b>                                 |             |            |
|                               | Love and surrender                                                   | 77.9%(112)  |            |

|                         |           |                                            |            |
|-------------------------|-----------|--------------------------------------------|------------|
|                         |           | Utility                                    | 37.5%(54)  |
|                         |           | Gratitude toward the patient               | 29..8%(43) |
|                         |           | Personal Growth                            | 38.5%(55)  |
|                         |           | Others (empathy. respect)                  | 2.9%(4)    |
|                         |           | <b>Negative contributed feelings</b>       |            |
|                         |           | Overload                                   | 74.6%(107) |
|                         |           | Physical health problems                   | 35.8%(55)  |
|                         |           | Psychological health problems              | 35.8%(55)  |
|                         |           | Others (embarrassment. worry. frustration) | 4.4%(6)    |
|                         |           | <b>CLINICAL DATA</b>                       |            |
| <b>TYPE OF DEMENTIA</b> | <b>OF</b> | Alzheimer                                  | 66.7 %(96) |
|                         |           | Vascular Dementia                          | 13.2%(19)  |
|                         |           | Lewy Body Dementia                         | 2.8%(4)    |
|                         |           | Frontotemporal Dementia                    | 6.9%(10)   |
|                         |           | Dementia associated with Parkinson's       | 4.2 %(6)   |
|                         |           | Dementia mixture ( Alzheimer + vascular)   | 4.9%(7)    |
|                         |           | Other dementia types                       | 1.4%(2)    |
|                         |           |                                            |            |
| <b>Dementia phase</b>   |           | Mild                                       | 13.2 %(19) |
|                         |           | Moderate                                   | 61.1 %(88) |
|                         |           | Severe                                     | 25.7 %(37) |

Abbreviations: M. mean; SD. standard deviation.
